# Supplementary material
Source: PubMed Central journal article supplement (PMC7939975)

# 20 Replicates of Viral RNA dilutions with N1 and N2 primer/probes

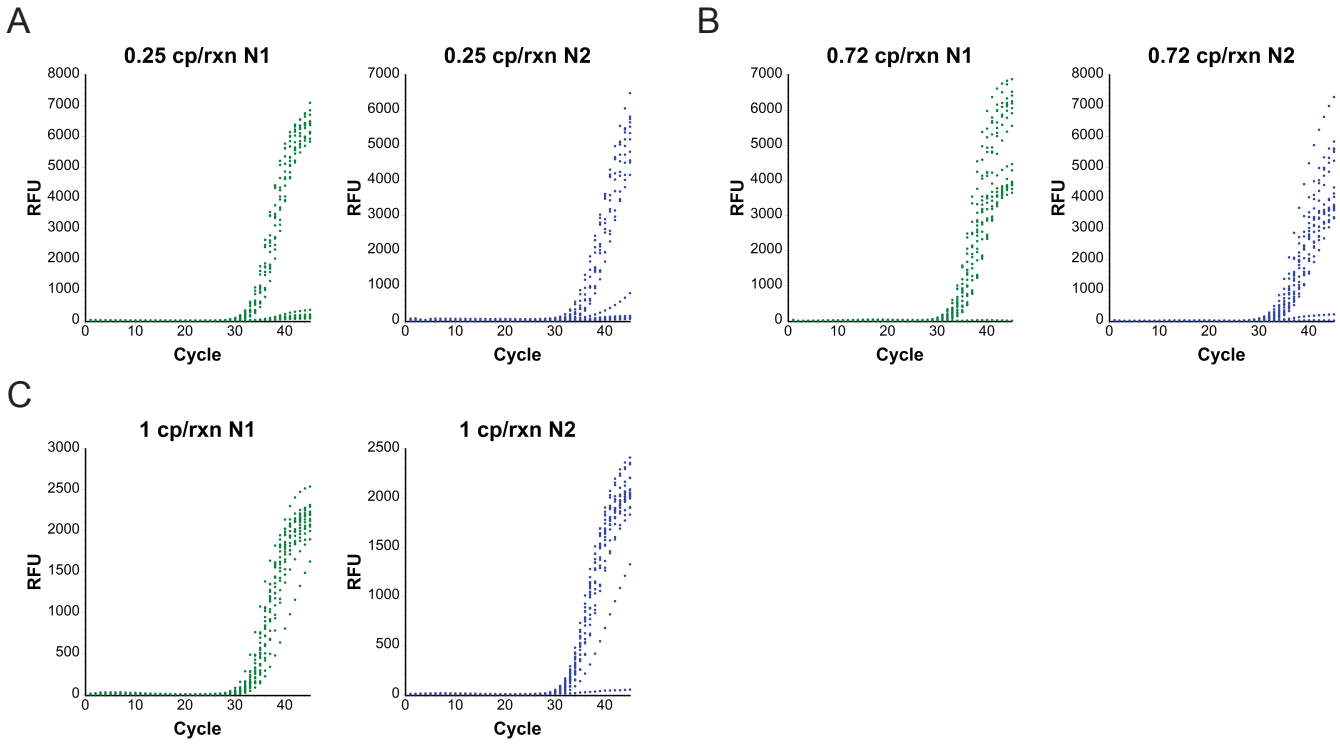

# 12 Replicates of ddH<sub>2</sub>O with N1 and N2 primer/probes

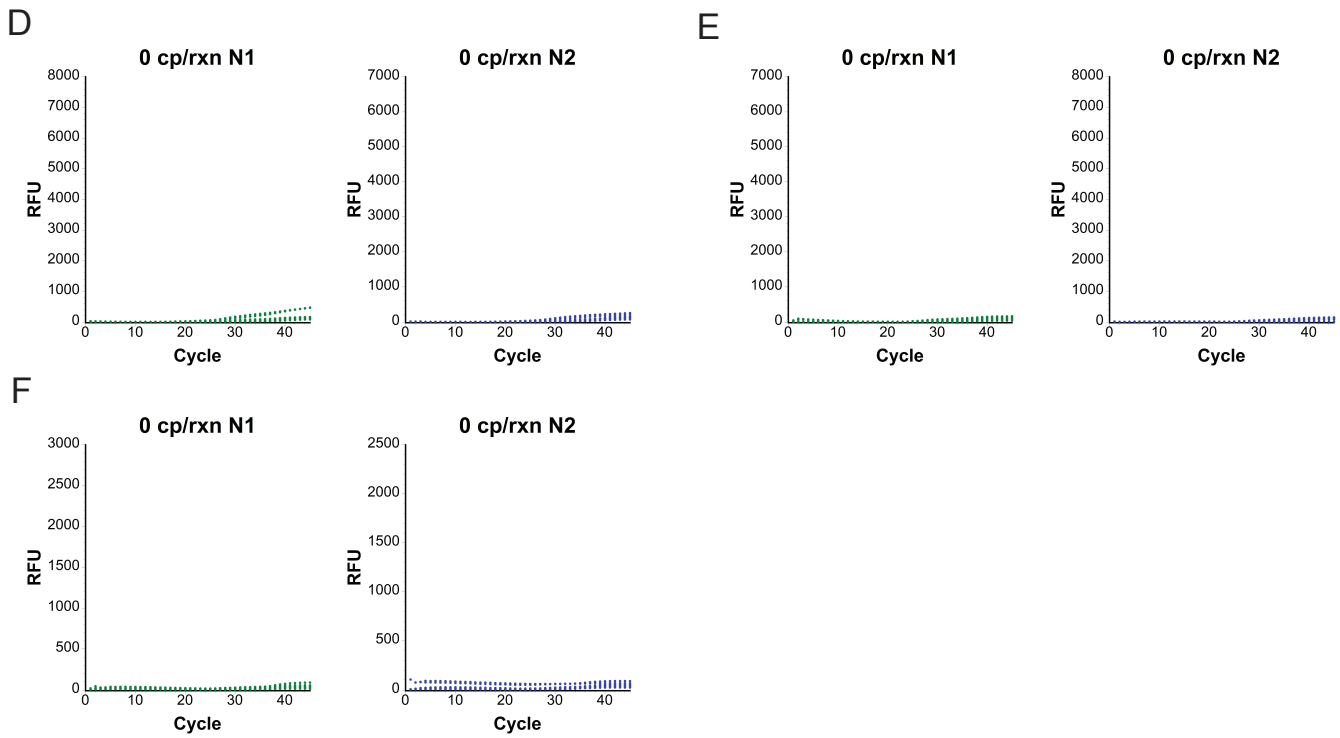

Supplement: mmc2.pdf [file mmc2.pdf]
