# Supplementary material
Source: PubMed Central journal article supplement (PMC7939975)

**A**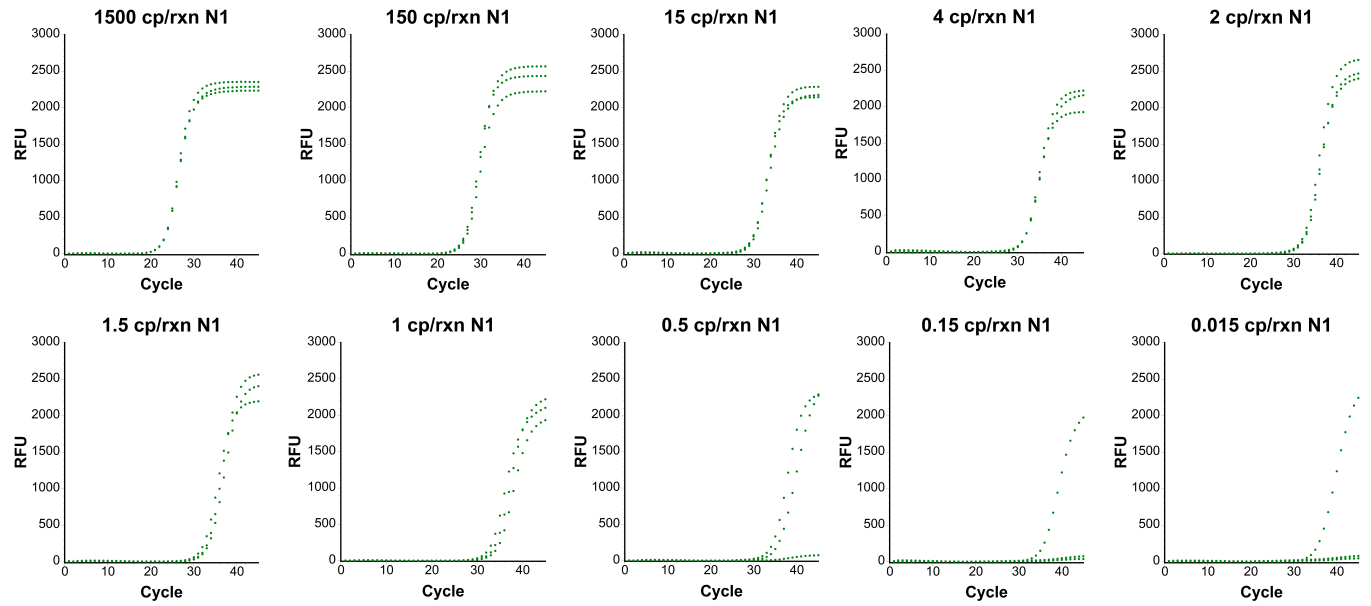**B**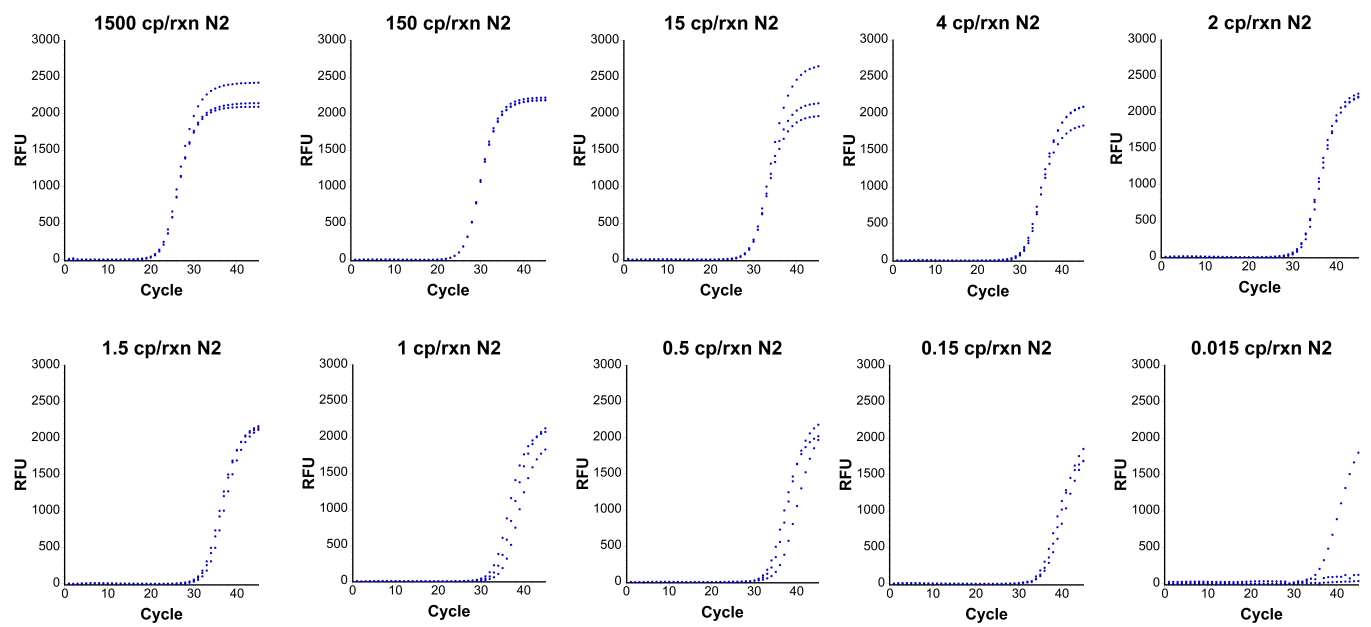

Supplement: mmc1.pdf [file mmc1.pdf]

**A**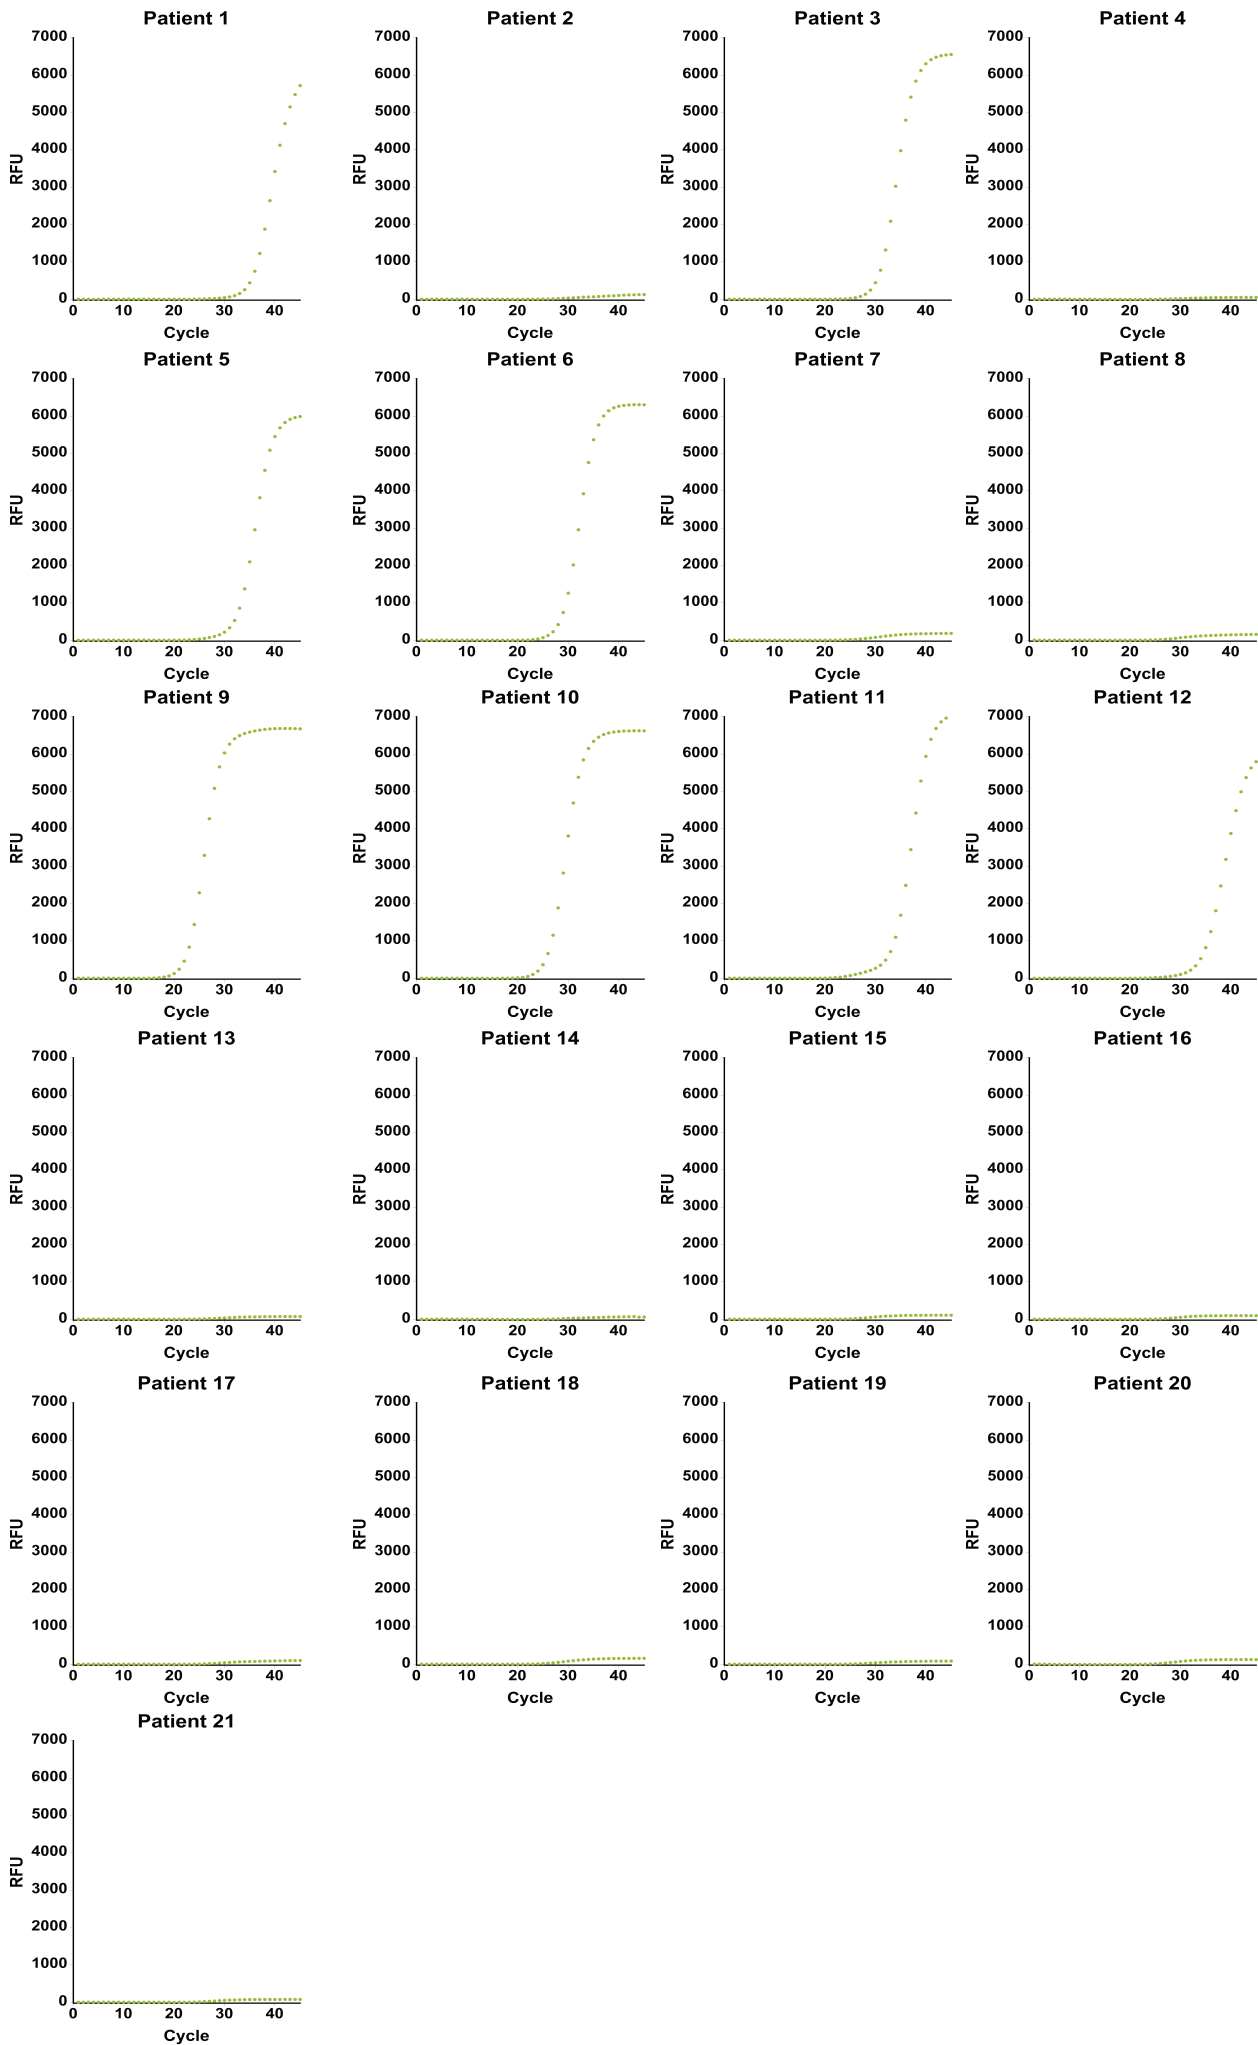



**C**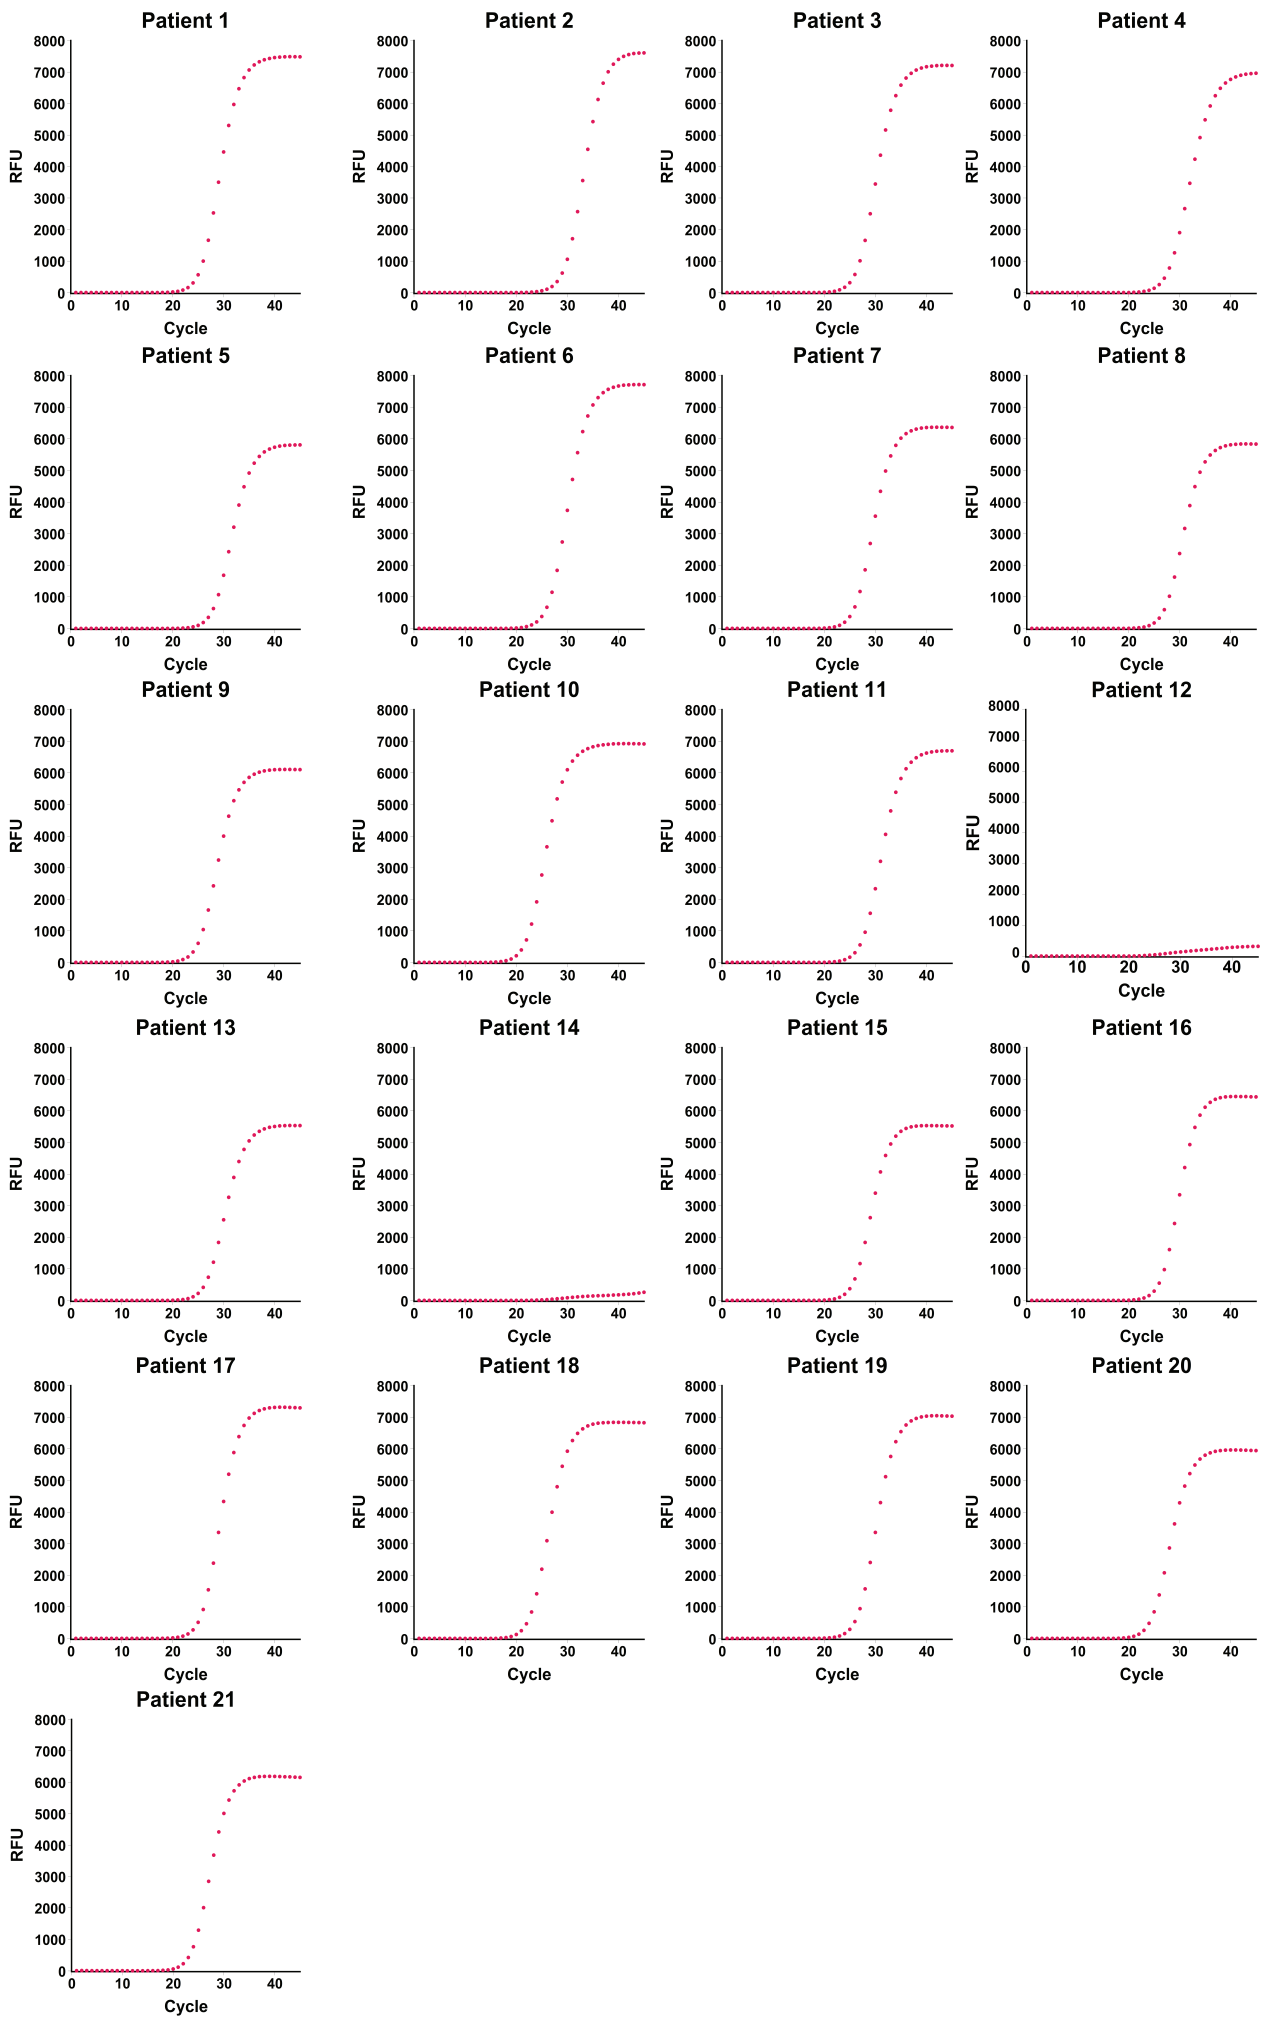

Supplement: mmc3.pdf [file mmc3.pdf]
